# Supplementary material for: The Spatial Structure of Stimuli Shapes the Timescale of Correlations in Population Spiking Activity
Source: PubMed Central journal article supplement (PMC3441501; doi:10.1371/journal.pcbi.1002667), 2012-09-13
Supplement: pcbi.1002667.s002.pdf [file pcbi.1002667.s002.pdf]

## Computing $A(f)$ and $Q_{ii}(f)$

In this section, we present the theoretical techniques that we use to compute the spike train cellular response function  $A(f)$  and power spectrum  $Q_{ii}(f)$  for the ELL model; these techniques are fully presented elsewhere [1] and we refer the reader there for further details.

Consider a leaky integrate and fire neuron model driven by a combination of a weak signal  $s(t)$  and a white noise forcing  $\xi(t)$ :

$$\frac{dV}{dt} = \frac{\mu - V}{\tau} + \epsilon s(t) + \sigma \xi(t), \quad (1)$$

where  $\mu$  is a drift term,  $\sigma$  is the intensity of a stochastic process, and  $\epsilon \ll \sigma$ . The voltage distribution  $p(V, t)$  associated with the Eq. 1 obeys the Fokker-Planck equation [2]:

$$\frac{\partial p}{\partial t} = -\frac{\partial j}{\partial V} = \frac{\partial}{\partial V} \left[ \left( \frac{V - \mu}{\tau} - \epsilon s(t) \right) p \right] + \frac{\sigma^2}{2} \frac{\partial^2 p}{\partial V^2}, \quad (2)$$

where  $j(V, t)$  is the probability flux. The boundary conditions for the probability distribution and flux at threshold are  $p(V_{th}) = 0$  and  $j(V_{th}, t) = r(t)$ , where  $r(t)$  is the firing rate. Furthermore, the flux obeys  $j(V, t) = r(t)$  for  $V \in [V_{re}, V_{th}]$  and 0 otherwise, when the system is stationary.

For  $\epsilon = 0$  we obtain the steady state distribution  $p_0(V)$  and flux  $j_0(V)$  via:

$$\begin{aligned} \frac{\partial p_0}{\partial V} &= -\frac{2}{\sigma^2} \left[ j_0 + \frac{1}{\tau} (V - \mu) p_0 \right], \\ \frac{\partial j_0}{\partial V} &= r_0 \delta(V - V_{re}) - r_0 \delta(V - V_{th}). \end{aligned} \quad (3)$$

Numerically solving the above equations and using the normalization condition  $\int_{-\infty}^{V_{th}} p_0(V) dV = 1$ , we can solve for the steady state firing rate  $r_0$ .

To compute the second-order spike train statistics, we consider the time-dependent Fokker-Planck equation in the Fourier domain:

$$\begin{aligned} \frac{\partial P}{\partial V} &= -\frac{2}{\sigma^2} \left[ J + \frac{1}{\tau} (V - \mu) P \right], \\ \frac{\partial J}{\partial V} &= -2\pi i f P - R(f) \delta(V - V_{th}) + R(f) \delta(V - V_{re}), \end{aligned} \quad (4)$$

where  $P(V, f)$ ,  $J(V, f)$ , and  $R(f)$  denote the Fourier transform of  $p(V, t)$ ,  $j(V, t)$ , and  $r(t)$ , respectively. Further,  $R(f)$  is computed with initial condition  $V = V_{re}$ . Solving this equation yields the Fourier transform of the first passage time density  $D(f)$  [1]. For the stationary case, we compute the power spectrum using a well known relation from renewal theory relating passage time statistics to autocovariance [3]:

$$Q_{ii}(f) = r_0 \left( 1 + 2\Re \left[ \frac{D(f)}{1 - D(f)} \right] \right), \quad (5)$$

where  $\Re[\cdot]$  denotes the real component.

Finally, we compute the cellular response  $A(f)$ . We let  $s(t) = e^{2\pi i f t}$  to provide a weak, periodic input to the neuron. Decomposing the probability density, flux, and firing rate into steady state and modulated components:

$$p = p_0 + p_1 e^{2\pi i f t}, \quad j = j_0 + j_1 e^{2\pi i f t}, \quad r = r_0 + r_1 e^{2\pi i f t}, \quad (6)$$

and then solving the Fokker-Planck equation in the Fourier domain for the time-dependent terms, we obtain a new set of equations:

$$\begin{aligned}\frac{\partial P_1}{\partial V} &= -\frac{2}{\sigma^2} \left[ J_1 + \frac{1}{\tau}(V - \mu) + \epsilon P_0 \right], \\ \frac{\partial J_1}{\partial V} &= -2\pi i f P_1 - R_1 \delta(V - V_{re}),\end{aligned}\tag{7}$$

with boundary conditions  $P_1(V_{th}, f) = 0$ , and importantly the flux perturbation at spike threshold:

$$J_1(V_{th}, f) = A(f).\tag{8}$$

These equations were solved numerically [1] obtaining a solution for the cellular response  $A(f)$ .

The above theory provided the components  $Q_{ii}(f)$  and  $A(f)$  required to compute the spike count correlation coefficient between the pair of superficial ELL neuron outputs.

## References

1. Richardson M (2008) Spike-train spectra and network response functions for non-linear integrate-and-fire neurons. *Biol Cybern* 99: 381–392.
2. Risken H (1996) *The Fokker-Planck equation: Methods of solution and applications*. New York: Springer, 488 pp.
3. Cox DR, Isham V (1980) *Point processes*. London: Chapman and Hall, 206 pp.
