# Supplementary material for: The Spatial Structure of Stimuli Shapes the Timescale of Correlations in Population Spiking Activity
Source: PLoS Comput Biol. 2012 Sep 13;8(9):e1002667. doi: 10.1371/journal.pcbi.1002667 (PMC3441501; doi:10.1371/journal.pcbi.1002667)
Supplement: Table S1 — Model summary. (PDF) [file pcbi.1002667.s001.pdf]

| A. Model Summary              |                                                      |
|-------------------------------|------------------------------------------------------|
| Populations                   | Three: Deep (Dp), EGp, and Superficial (Sf)          |
| Topology                      | Feedforward                                          |
| Connectivity                  | All-to-all                                           |
| Neuron models                 | Leaky integrate-and-fire (LIF)                       |
| Channel model                 | -                                                    |
| Synapse model                 | $\delta$ current-based and exponential current-based |
| Plasticity                    | -                                                    |
| Input                         | Gaussian white noise                                 |
| Measurements & Spike activity | Spike times                                          |

| B. Populations |          |      |
|----------------|----------|------|
| Name           | Elements | Size |
| Dp             | LIF      | 800  |
| EGp            | LIF      | 200  |
| Sf             | LIF      | 2    |

| C. Connectivity |        |        |                                                   |
|-----------------|--------|--------|---------------------------------------------------|
| Name            | Source | Target | Pattern                                           |
| Dp to EGp       | Dp     | EGp    | All-to-all, weight $a_1 > 0$ , $\delta$ -function |
| EGp to Sf       | EGp    | Sf     | All-to-all, weight $a_2 < 0$ , exponential        |

| D. Neuron Model       |                                                                   |
|-----------------------|-------------------------------------------------------------------|
| Name                  | LIF neuron                                                        |
| Subthreshold dynamics | $\frac{dV}{dt} = \frac{1}{\tau}(\mu - V) + I(t)$                  |
| Spiking               | If $V(t) = V_{th}$ , $V(t^+) = V_{re}$ ; $t$ is marked as a spike |

| E. Input   |                                                                                   |                                                        |
|------------|-----------------------------------------------------------------------------------|--------------------------------------------------------|
| Population | Recurrent Input Current                                                           | External input current                                 |
| Dp         | -                                                                                 | $\sigma(\sqrt{c}\xi_s(t) + \sqrt{1-c}\xi_{i,n,Dp}(t))$ |
| EGp        | $a_1 \sum_{j=1}^{N_{Dp}} \sum_k \delta(t - t_{jk,Dp})$                            | $\sigma\xi_{i,n,EGp}(t)$                               |
| Sf         | $a_2 \sum_{j=1}^{N_{EGp}} \sum_k \Theta(t - t_{jk,EGp})e^{-(t-t_{jk,Dp})/\tau_s}$ | $\sigma(\sqrt{c}\xi_s(t) + \sqrt{1-c}\xi_{i,n,Sf}(t))$ |

**F. Parameters**

| Parameter    | Description                               | Value             |
|--------------|-------------------------------------------|-------------------|
| $N_{Dp}$     | Number of deep neurons                    | 800               |
| $N_{EGp}$    | Number of EGp neurons                     | 200               |
| $N_{Sf}$     | Number of superficial neurons             | 2                 |
| $\tau_{Dp}$  | Deep membrane time constant               | 10 ms             |
| $\tau_{EGp}$ | EGp membrane time constant                | 10 ms             |
| $\tau_{Sf}$  | Superficial membrane time constant        | 15 ms             |
| $\mu_{Dp}$   | Deep bias                                 | -56 mV            |
| $\mu_{EGp}$  | EGp bias                                  | -60 mV            |
| $\mu_{Sf}$   | Superficial bias                          | -56 mV            |
| $V_{th}$     | Threshold voltage                         | -55 mV            |
| $V_{re}$     | Reset voltage                             | -65 mV            |
| $\sigma$     | Noise strength                            | 1 mV              |
| $a_1$        | Deep to EGp synaptic strength             | $7.6/N_{Dp}$ mV   |
| $a_2$        | EGp to Superficial synaptic strength      | $-7.6/N_{EGp}$ mV |
| $\tau_s$     | EGp to Superficial synaptic time constant | 5 ms              |
| $c_l$        | Local input correlation                   | 0.1               |
| $c_g$        | Global input correlation                  | 0.2               |
